# Supplementary material for: Emerging Monkeypox Virus Sublineage C.1 Causing Community Transmission, Vietnam, 2023
Source: PubMed Central journal article supplement (PMC11521191; doi:10.3201/eid3011.240729), 2024-11
Supplement: 24-0729-Techapp-s1.pdf [file 24-0729-Techapp-s1.pdf]

*EID cannot ensure accessibility for Supplemental Materials supplied by authors. Readers who have difficulty accessing supplementary content should contact the authors for assistance.*

# Emerging Monkeypox Virus Sublineage C.1 Causing Community Transmission, Vietnam, 2023

## Appendix

### Genome amplification and sequencing

MPXV whole-genome sequencing was carried out using our established metagenomics based approach that has delivered consistent results for emerging viruses, including MPXV (1–4). In brief, 100  $\mu$ L of sample were pre-treated with 20 U of turbo DNase and 2U RNase I (Ambion-Life Technology, ThermoFisher) at 37°C for 30 min to reduce host genetic background. Nucleic acids (NA) were then isolated from the pre-treated samples using DNeasy Blood & Tissue Kit (QIAGEN), and eluted in 50  $\mu$ L of the elution buffer provided with the extraction kit. Next, the isolated NA was subjected to a pre-amplification step to enrich for viral NA using a non-ribosomal random PCR assay with primers designed to preferentially bind to viral NA but not human ribosomal RNA (1,5). The random PCR procedure was carried out as previously described (1,2). In brief, double-stranded DNA was synthesized from the isolated nucleic acids using a set of 96 non-ribosomal primer (Appendix Table 5), followed by a random amplification step using FR20RV primer (Appendix Table 5). The amplified products were then cleaned up and used as input for whole-genome sequencing. For this step, Illumina COVIDSeq reagents (Illumina) were used to generate DNA library, following manufacturer’s instructions. The concentration and size of the constructed library were accessed using Qubit dsDNA HS kit (Invitrogen) and Agilent High Sensitivity D1000 kit (Aligent Technologies), respectively. Finally, the prepared library was sequenced using MiSeq Reagent kit V3 (150 cycles) or Miseq Nano kit V2 (300 cycles) (Illumina) in a Miseq platform.

## Sequence assembly

A reference-based mapping strategy available in Geneious Prime 2022.2.2 (<https://www.geneious.com>) was applied to generate the consensus from the obtained sequencing reads with consensus calling criteria of  $\geq 5$  reads (6). For this analysis, we use a MPXV sequence (LC760460.1) as a reference. The obtained consensus were further manually edited to clarify the ambiguous positions (if any), and to exclude bases with low quality (i.e., a Phred quality score of  $< 20$ ).

## Assessment of intra-host evolution over the course of illness and PCR confirmatory testing

For investigation of within host evolution over the course of illness, individual positions across the genome were carefully inspected to identify the potential changes leading to non-synonymous substitutions. For this analysis, areas with low sequencing depth (i.e.,  $< 5$  reads with high quality reflected by a Phred quality score of  $\geq 30$ ) were also taken into account during the initial screening step. To rule out potential biases introduced by metagenomic associated steps, potential non-synonymous substitutions were then subjected to confirmatory testing using PCR followed by Sanger sequencing using with primers designed to capture the sequence of interest (Appendix Table 6). Only mutations confirmed by both methods were considered as real substitutions. Synonymous substitutions were not investigated in this study.

## Phylogenetic and mutation analysis

Here we focused our analysis on sublineage C.1. Accordingly, we retrieved all non-redundant whole-genome sequences of this sublineage deposited to GISAID (<https://www.epicov.org/epi3/frontend#3b750a>) or NCBI Virus (taxid: 10244) as of March 28<sup>th</sup> 2024. This resulted in a total of 223 whole-genome sequences of sublineage C.1. For non-C.1 lineages, we used 148 whole-genome sequences representing for geographic regions from which those viruses were isolated as indicated by Nexstrain, including (lineage A (n = 43), sublineage A.1 (n = 20), sublineage A.2 (n = 18), lineage sub A.3 (n = 7), sublineage B.1 (n = 60). Consequently, a total of 385 whole-genome sequence (223 C.1, 148 non-C.1. and 14 from the present study, Appendix Table 7) were included for phylogenetic analysis. A time resolved

phylogenetic tree was then reconstructed using Nextstrain pipeline with Augur v24.2.3. A lineage-A sequence (Accession number: NC\_063383.1) was used to root the tree.

For detection of novel substitutions, we used sequence alignment of sublineage C.1 viruses. We performed the analysis using Nextclade v3.3.1 (<https://clades.nextstrain.org/>), and a lineage-A sequence (Accession number: NC\_063383.1) was used as a reference sequence. Additionally, a global MPXV dataset consisting of 10544 non-redundant sequences retrieved GISAID and the NCBI GenBank (29 July 2024) was assembled to further exclude the presence of such potential novel substitutions in non-C.1 sublineage sequences.

## References

1. Nguyen AT, Tran TT, Hoang VM, Nghiem NM, Le NN, Le TT, et al. Development and evaluation of a non-ribosomal random PCR and next-generation sequencing based assay for detection and sequencing of hand, foot and mouth disease pathogens. *Virol J.* 2016;13:125. [PubMed](#) <https://doi.org/10.1186/s12985-016-0580-9>
2. Anh NT, Hong NTT, Nhu LNT, Thanh TT, Lau CY, Limmathurotsakul D, et al. Viruses in Vietnamese patients presenting with community-acquired sepsis of unknown cause. *J Clin Microbiol.* 2019;57:e00386-19. [PubMed](#) <https://doi.org/10.1128/JCM.00386-19>
3. Dung NT, Hung LM, Hoa HTT, Nga LH, Hong NTT, Thuong TC, et al. Monkeypox virus infection in 2 female travelers returning to Vietnam from Dubai, United Arab Emirates, 2022. *Emerg Infect Dis.* 2023;29:778–81. [PubMed](#) <https://doi.org/10.3201/eid2904.221835>
4. Anh NT, Nhu LNT, Van HMT, Hong NTT, Thanh TT, Hang VTT, et al. Emerging coxsackievirus A6 causing hand, foot and mouth disease, Vietnam. *Emerg Infect Dis.* 2018;24:654–62. [PubMed](#) <https://doi.org/10.3201/eid2404.171298>
5. Endoh D, Mizutani T, Kirisawa R, Maki Y, Saito H, Kon Y, et al. Species-independent detection of RNA virus by representational difference analysis using non-ribosomal hexanucleotides for reverse transcription. *Nucleic Acids Res.* 2005;33:e65. [PubMed](#) <https://doi.org/10.1093/nar/gni064>
6. Ladner JT, Beitzel B, Chain PS, Davenport MG, Donaldson EF, Frieman M, et al.; Threat Characterization Consortium. Standards for sequencing viral genomes in the era of high-throughput sequencing. *MBio.* 2014;5:e01360–14. [PubMed](#) <https://doi.org/10.1128/mBio.01360-14>

**Appendix Table 1.** Detailed clinical and laboratory findings of the 3 fatal cases in study of emerging monkeypox virus sublineage C.1 causing community transmission, Vietnam, 2023\*

| Characteristic                      | Patient 04              | Patient 13 | Patient 17         |
|-------------------------------------|-------------------------|------------|--------------------|
| Age, y                              | 29                      | 27         | 27                 |
| Sex at birth                        | M                       | M          | M                  |
| Duration of hospital stay, d        | 19                      | 13         | 29                 |
| HIV infection                       | Yes                     | Yes        | Yes                |
| CD4 cell count, cells/ $\mu$ L      | 01                      | 16         | 05                 |
| Antiretroviral therapy              | No                      | No         | Yes                |
| Mechanical ventilation              | Yes                     | Yes        | Yes                |
| Septic shock                        | Yes                     | Yes        | Yes                |
| Anemia                              | Yes                     | Yes        | No                 |
| Acute respiratory distress syndrome | Yes                     | Yes        | Yes                |
| Acute renal injury                  | Yes                     | No         | Yes                |
| Acute liver dysfunction             | Yes                     | Yes        | Yes                |
| Ocular infection                    | Yes                     | Yes        | Unknown            |
| No. skin lesions at baseline        | >250                    | 101–250    | >250               |
| Lesion characteristics              |                         |            |                    |
| Necrotizing                         | Yes                     | Yes        | Yes                |
| Confluent                           | Yes                     | Yes        | Yes                |
| Size, mm                            | 5–7                     | 20–25      | 3–7                |
| Comorbidity†                        | Yes                     | No         | Yes                |
| Tuberculosis                        | Positive‡               | Negative   | Not done           |
| Syphilis§                           | Negative                | Positive   | Not done           |
| Pneumocystis jirovecii¶             | Positive                | negative   | Not done           |
| Others                              | <i>Candida albicans</i> | No         | <i>Candida spp</i> |

\*Patient codes are consistent with those shown in Appendix Figure 1. Virus from P17 was not sequenced.  
†Results of routine culture.  
‡Gastrointestinal and military tuberculosis by Ziehl–Neelsen smear microscopy examination of stool and sputum samples.  
§By rapid test.  
¶By PCR diagnosis.

**Appendix Table 2.** Summary of sequencing results of 14 genome sequences from 14 patients

| Sample ID | Sample type | Number of raw reads | Number of mapped reads | Mean sequencing depth (min-max) | % Genome coverage |
|-----------|-------------|---------------------|------------------------|---------------------------------|-------------------|
| P01       | Lesion swab | 2,947,694           | 1,631,089              | 1339 (5–17987)                  | 96.07             |
| P02       | Lesion swab | 3,375,932           | 2,528,234              | 963.4 (5–30081)                 | 95.49             |
| P03       | Lesion swab | 2,018,174           | 726,272                | 274.5 (5–9138)                  | 90.29             |
| P04       | Lesion swab | 3,256,816           | 2,684,010              | 1050.7 (5–38317)                | 96.23             |
| P05       | Lesion swab | 3,086,716           | 2,016,767              | 769.5 (5–26302)                 | 95.27             |
| P06       | Lesion swab | 3,064,754           | 309,579                | 116.8 (5–6485)                  | 72.93             |
| P07       | Lesion swab | 2,978,534           | 352,866                | 132.8 (5–5172)                  | 80.80             |
| P08       | Lesion swab | 2,778,924           | 401,856                | 151 (5–5642)                    | 79.28             |
| P10       | Lesion swab | 3,787,078           | 3,453,213              | 1330 (5–56824)                  | 95.83             |
| P11       | Lesion swab | 2,199,790           | 1,338,296              | 508.1 (5–13463)                 | 89.86             |
| P09       | Lesion swab | 2,773,716           | 2,365,381              | 915.4 (5–43935)                 | 96.46             |
| P14       | Lesion swab | 877,648             | 546,075                | 205.8 (5–7540)                  | 84.46             |
| P13       | Lesion swab | 3,848,392           | 3,462,380              | 1343.1 (5–48465)                | 98.44             |
| P15       | Lesion swab | 3,737,842           | 2,738,850              | 1053.3 (5–126305)               | 97.32             |

**Appendix Table 3.** Frequency, location and associated protein functions of the 12 novel mutations

| Novel mutation | Protein Function       | APOBEC3-like mutation | Frequency |
|----------------|------------------------|-----------------------|-----------|
| OPG027:E104K   | Host Modulation        | Yes                   | 2/14      |
| OPG047:D462Y   | Unknown                | No                    | 1/14      |
| OPG063:T225S   | Transcription          | No                    | 1/14      |
| OPG063:N239S   | Transcription          | No                    | 1/14      |
| OPG068:S428L   | Virus Assembly/Budding | Yes                   | 13/14     |
| OPG087:P186T   | Transcriptionssss      | No                    | 1/14      |
| OPG102:T110A   | Transcription          | No                    | 1/14      |
| OPG108:N117K   | Virulence              | No                    | 1/14      |
| OPG118:N76Y    | Transcription          | No                    | 1/14      |
| OPG138:S170P   | Morphogenesis          | No                    | 1/14      |
| OPG160:S236P   | Morphogenesis          | No                    | 1/14      |
| OPG189:I514S   | Virulence              | No                    | 1/14      |

**Appendix Table 4.** Results of intra-host evolution investigation of metagenomics reads in samples collected over the course of illness of an advanced HIV patient

| Category     | Type             | Lesion swab (10/2/2023) |     | Lesion swab(10/9/2023) |    | Lesion swab (10/16/2023) |    | BAL (10/19/2023) |     | Lesion swab (10/11/2023) |     |
|--------------|------------------|-------------------------|-----|------------------------|----|--------------------------|----|------------------|-----|--------------------------|-----|
| OPG189:I514S | Substitution     | Ile to Ser              |     | Ile to Ser             |    | Ile to Ser               |    | Ile to Ser       |     | Ile to Ser               |     |
|              | Ratio (%)        | 51                      | 49  | 22                     | 78 | 24                       | 76 | 26               | 74  | 22                       | 78  |
|              | Sequencing depth | 183                     | 176 | 14                     | 49 | 29                       | 92 | 34               | 96  | 29                       | 103 |
| OPG187:K233M | Substitution     | NA                      | NA  | NA                     | NA | NA                       | NA | NA               | NA  | Lys to Met               |     |
|              | Ratio (%)        | NA                      | NA  | NA                     | NA | NA                       | NA | NA               | NA  | 46                       | 54  |
|              | Sequencing depth | NA                      | NA  | NA                     | NA | NA                       | NA | NA               | NA  | 50                       | 59  |
| OPG060:M147I | Substitution     | NA                      | NA  | NA                     | NA | NA                       | NA | Ile to Met       |     | NA                       | NA  |
|              | Ratio (%)        | NA                      | NA  | NA                     | NA | NA                       | NA | 0                | 100 | NA                       | NA  |
|              | Sequencing depth | NA                      | NA  | NA                     | NA | NA                       | NA | 0                | 4   | NA                       | NA  |
| OPG164:S63C  | Substitution     | NA                      | NA  | NA                     | NA | NA                       | NA | Ser to Cys       |     | NA                       | NA  |
|              | Ratio (%)        | NA                      | NA  | NA                     | NA | NA                       | NA | 0                | 100 | NA                       | NA  |
|              | Sequencing depth | NA                      | NA  | NA                     | NA | NA                       | NA | 0                | 2   | NA                       | NA  |

\*Two nonsynonymous substitutions detected in the BAL collected on 19 October 2023 are in red. Positions carrying single nucleotide polymorphism are indicated by blue. The results of Sanger sequencing of those corresponding positions shown in Appendix Figure 3. NA: indicate positions where no changes were recorded. None of the lesion swabs were collected from the same rash or area.

**Appendix Table 5.** Primer sequences used for non-ribosomal random PCR

| Primer | Sequence of primer (5'-3') | Primer | Sequence of primer (5'-3') | Primer | Sequence of primer(5'-3')   |
|--------|----------------------------|--------|----------------------------|--------|-----------------------------|
| FR20RV | GCCGGAGCTCTGCAGATATC       | 33     | GCCGGAGCTCTGCAGATATCTAGTCG | 66     | GCCGGAGCTCTGCAGATATCTAACGC  |
| 1      | GCCGGAGCTCTGCAGATATCGATATC | 34     | GCCGGAGCTCTGCAGATATCGTAGAC | 67     | GCCGGAGCTCTGCAGATATCGGTAT   |
| 2      | GCCGGAGCTCTGCAGATATCTAGTAT | 35     | GCCGGAGCTCTGCAGATATCCTATAG | 68     | GCCGGAGCTCTGCAGATATCCTCATA  |
| 3      | GCCGGAGCTCTGCAGATATCTATAGT | 36     | GCCGGAGCTCTGCAGATATCTAGCTA | 69     | GCCGGAGCTCTGCAGATATCAATTTG  |
| 4      | GCCGGAGCTCTGCAGATATCTATATA | 37     | GCCGGAGCTCTGCAGATATCACTACT | 70     | GCCGGAGCTCTGCAGATATCCTGGTA  |
| 5      | GCCGGAGCTCTGCAGATATCATACTA | 38     | GCCGGAGCTCTGCAGATATCTAACGA | 71     | GCCGGAGCTCTGCAGATATCTTTCATG |
| 6      | GCCGGAGCTCTGCAGATATCATATAT | 39     | GCCGGAGCTCTGCAGATATCCGACTA | 72     | GCCGGAGCTCTGCAGATATCGCGATA  |
| 7      | GCCGGAGCTCTGCAGATATCGTGAC  | 40     | GCCGGAGCTCTGCAGATATCTACTAG | 73     | GCCGGAGCTCTGCAGATATCACTAAG  |
| 8      | GCCGGAGCTCTGCAGATATCACTATA | 41     | GCCGGAGCTCTGCAGATATCAGTAGT | 74     | GCCGGAGCTCTGCAGATATCGCATA   |
| 9      | GCCGGAGCTCTGCAGATATCCGTAAT | 42     | GCCGGAGCTCTGCAGATATCGTTAAC | 75     | GCCGGAGCTCTGCAGATATCCAATAT  |
| 10     | GCCGGAGCTCTGCAGATATCCTATAC | 43     | GCCGGAGCTCTGCAGATATCGTCTAC | 76     | GCCGGAGCTCTGCAGATATCACCGTA  |
| 11     | GCCGGAGCTCTGCAGATATCTATACG | 44     | GCCGGAGCTCTGCAGATATCTACAAG | 77     | GCCGGAGCTCTGCAGATATCGTGCTA  |
| 12     | GCCGGAGCTCTGCAGATATCTATGCG | 45     | GCCGGAGCTCTGCAGATATCTACCAG | 78     | GCCGGAGCTCTGCAGATATCACGCTA  |
| 13     | GCCGGAGCTCTGCAGATATCGATACT | 46     | GCCGGAGCTCTGCAGATATCTGGATT | 79     | GCCGGAGCTCTGCAGATATCATGTCTG |
| 14     | GCCGGAGCTCTGCAGATATCCGTATA | 47     | GCCGGAGCTCTGCAGATATCTCGTTA | 80     | GCCGGAGCTCTGCAGATATCAGCTTA  |
| 15     | GCCGGAGCTCTGCAGATATCGTATAG | 48     | GCCGGAGCTCTGCAGATATCATAGTA | 81     | GCCGGAGCTCTGCAGATATCCGACAT  |
| 16     | GCCGGAGCTCTGCAGATATCCGGTTA | 49     | GCCGGAGCTCTGCAGATATCATAGTC | 82     | GCCGGAGCTCTGCAGATATCGCTATA  |
| 17     | GCCGGAGCTCTGCAGATATCAATAGT | 50     | GCCGGAGCTCTGCAGATATCCTAGTA | 83     | GCCGGAGCTCTGCAGATATCGCTATG  |
| 18     | GCCGGAGCTCTGCAGATATCCGCATA | 51     | GCCGGAGCTCTGCAGATATCGTACTA | 84     | GCCGGAGCTCTGCAGATATCTGTAAG  |
| 19     | GCCGGAGCTCTGCAGATATCATTACG | 52     | GCCGGAGCTCTGCAGATATCTAAGTT | 85     | GCCGGAGCTCTGCAGATATCAACTTA  |
| 20     | GCCGGAGCTCTGCAGATATCTTAACA | 53     | GCCGGAGCTCTGCAGATATCATATCC | 86     | GCCGGAGCTCTGCAGATATCATAACG  |
| 21     | GCCGGAGCTCTGCAGATATCAGTATC | 54     | GCCGGAGCTCTGCAGATATCTCGATA | 87     | GCCGGAGCTCTGCAGATATCATGTTA  |
| 22     | GCCGGAGCTCTGCAGATATCTGTAA  | 55     | GCCGGAGCTCTGCAGATATCGTACCA | 88     | GCCGGAGCTCTGCAGATATCTGGTAT  |
| 23     | GCCGGAGCTCTGCAGATATCACTATT | 56     | GCCGGAGCTCTGCAGATATCGTATCA | 89     | GCCGGAGCTCTGCAGATATCTGCGTA  |
| 24     | GCCGGAGCTCTGCAGATATCTAACCG | 57     | GCCGGAGCTCTGCAGATATCATACTC | 90     | GCCGGAGCTCTGCAGATATCGGATAT  |
| 25     | GCCGGAGCTCTGCAGATATCCGATAT | 58     | GCCGGAGCTCTGCAGATATCACATTA | 91     | GCCGGAGCTCTGCAGATATCCATAGC  |
| 26     | GCCGGAGCTCTGCAGATATCGTATAC | 59     | GCCGGAGCTCTGCAGATATCATATTG | 92     | GCCGGAGCTCTGCAGATATCCATACT  |
| 27     | GCCGGAGCTCTGCAGATATCAATCCA | 60     | GCCGGAGCTCTGCAGATATCCGTCTA | 93     | GCCGGAGCTCTGCAGATATCCGGATA  |
| 28     | GCCGGAGCTCTGCAGATATCTAGCAC | 61     | GCCGGAGCTCTGCAGATATCCTTAGT | 94     | GCCGGAGCTCTGCAGATATCTTACTA  |
| 29     | GCCGGAGCTCTGCAGATATCATATCG | 62     | GCCGGAGCTCTGCAGATATCCTTACA | 95     | GCCGGAGCTCTGCAGATATCACTCGT  |
| 30     | GCCGGAGCTCTGCAGATATCAATATT | 63     | GCCGGAGCTCTGCAGATATCTTATGC | 96     | GCCGGAGCTCTGCAGATATCTAAGGT  |
| 31     | GCCGGAGCTCTGCAGATATCTATAGC | 64     | GCCGGAGCTCTGCAGATATCATACGC |        |                             |
| 32     | GCCGGAGCTCTGCAGATATCCTTGTA | 65     | GCCGGAGCTCTGCAGATATCCGCTTA |        |                             |

**Appendix Table 6.** Primer sequences used for confirmatory experiments

| Mutations    | Primer direction | Oligo sequences (5'-3') |
|--------------|------------------|-------------------------|
| OPG060:M147I | Forward          | GTTAGACAACACACCGACGA    |
|              | Reverse          | TCAATATCTCCTTCTGGGT     |
| OPG068:S428L | Forward          | ACGAGTGCTGCGGACATTAA    |
|              | Reverse          | ACGAGCCAATTGTCCGTCTA    |
| OPG164:S63C  | Forward          | ACCGTAGTTGCGGGAACAA     |
|              | Reverse          | ACCAGCGAAGCTATCATCGT    |
| OPG187:K233M | Forward          | TCTAGACGTGGTGATCTAGA    |
|              | Reverse          | TACTCGACGAAACTCGTCGT    |
| OPG189:I514S | Forward          | TGAGATACGGTAGACATCCT    |
|              | Reverse          | ACGACCATTATCTCCAGCA     |

**Appendix Table 7.** List of sequences used for phylogenetic analysis

| Accession number | Source  | Date of collection | Country     | Host  | Clade | Lineage | Analysis  |
|------------------|---------|--------------------|-------------|-------|-------|---------|-----------|
| NC_063383.1      | GenBank | 2018-08-01         | Nigeria     | Human | IIb   | A       | phylogeny |
| OR500078.1       | GenBank | 2022-06-29         | Romania     | Human | IIb   | B.1.1   | phylogeny |
| OR500080.1       | GenBank | 2022-08-16         | Romania     | Human | IIb   | B.1.1   | phylogeny |
| OR500084.1       | GenBank | 2023-01-05         | Romania     | Human | IIb   | B.1.1   | phylogeny |
| OR500085.1       | GenBank | 2023-01-26         | Romania     | Human | IIb   | B.1.1   | phylogeny |
| OR464192.1       | GenBank | 2022-12-01         | USA         | Human | IIb   | B.1     | phylogeny |
| OR459776.1       | GenBank | 2022-11-15         | South Korea | Human | IIb   | A.2.1   | phylogeny |
| OR459777.1       | GenBank | 2022-11-22         | South Korea | Human | IIb   | A.2.1   | phylogeny |
| OR455100.1       | GenBank | 2023-08-01         | USA         | Human | IIb   | A.2.1   | phylogeny |
| OR427338.1       | GenBank | 2023-01-31         | USA         | Human | IIb   | B.1.2   | phylogeny |
| OR427343.1       | GenBank | 2023-03-01         | USA         | Human | IIb   | B.1.2   | phylogeny |
| OR264418.1       | GenBank | 2022-07-05         | Australia   | Human | IIb   | B.1     | phylogeny |
| OR264422.1       | GenBank | 2022-07-13         | Australia   | Human | IIb   | B.1     | phylogeny |
| OR126132.1       | GenBank | 2023-03-23         | Spain       | Human | IIb   | B.1.4   | phylogeny |
| OR113690.1       | GenBank | 2023-04-05         | Austria     | Human | IIb   | A.2.2   | phylogeny |
| OR086938.1       | GenBank | 2022-06-29         | Belgium     | Human | IIb   | B.1     | phylogeny |
| OQ957072.1       | GenBank | 2023-02-16         | Colombia    | Human | IIb   | B.1.11  | phylogeny |
| OQ773459.1       | GenBank | 2022-07-01         | Germany     | Human | IIb   | B.1     | phylogeny |
| OQ773518.1       | GenBank | 2022-07-31         | Germany     | Human | IIb   | B.1     | phylogeny |
| OQ721951.1       | GenBank | 2023-03-01         | Taiwan      | Human | IIb   | B.1     | phylogeny |
| OQ721953.1       | GenBank | 2023-03-01         | Taiwan      | Human | IIb   | B.1.3   | phylogeny |
| OQ672572.1       | GenBank | 2023-01-26         | Belgium     | Human | IIb   | B.1     | phylogeny |
| OQ672573.1       | GenBank | 2023-01-26         | Belgium     | Human | IIb   | B.1     | phylogeny |
| OQ468900.1       | GenBank | 2022-07-21         | USA         | Human | IIb   | B.1     | phylogeny |
| OQ451903.1       | GenBank | 2023-01-23         | Germany     | Human | IIb   | B.1.3   | phylogeny |
| OQ451904.1       | GenBank | 2023-01-23         | Germany     | Human | IIb   | B.1.3   | phylogeny |
| OQ411312.1       | GenBank | 2022-06-08         | Switzerland | Human | IIb   | B.1     | phylogeny |
| OQ261710.1       | GenBank | 2022-10-21         | Colombia    | Human | IIb   | B.1.10  | phylogeny |
| OP535312.1       | GenBank | 2018-02-01         | Nigeria     | Human | IIb   | A       | phylogeny |
| OP535313.1       | GenBank | 2018-01-31         | Nigeria     | Human | IIb   | A       | phylogeny |
| OP535314.1       | GenBank | 2018-01-31         | Nigeria     | Human | IIb   | A       | phylogeny |
| OP535315.1       | GenBank | 2018-02-28         | Nigeria     | Human | IIb   | A       | phylogeny |
| OP535316.1       | GenBank | 2018-02-01         | Nigeria     | Human | IIb   | A       | phylogeny |
| OP535317.1       | GenBank | 2018-01-31         | Nigeria     | Human | IIb   | A       | phylogeny |
| OP535318.1       | GenBank | 2017-12-31         | Nigeria     | Human | IIb   | A       | phylogeny |
| OP535319.1       | GenBank | 2017-12-31         | Nigeria     | Human | IIb   | A       | phylogeny |
| OP535320.1       | GenBank | 2017-11-01         | Nigeria     | Human | IIb   | A       | phylogeny |
| OP535321.1       | GenBank | 2017-10-31         | Nigeria     | Human | IIb   | A       | phylogeny |
| OP535322.1       | GenBank | 2017-10-31         | Nigeria     | Human | IIb   | A       | phylogeny |
| OP535323.1       | GenBank | 2017-10-01         | Nigeria     | Human | IIb   | A.3     | phylogeny |
| OP535324.1       | GenBank | 2018-02-01         | Nigeria     | Human | IIb   | A       | phylogeny |
| OP535325.1       | GenBank | 2018-06-01         | Nigeria     | Human | IIb   | A       | phylogeny |
| OP535326.1       | GenBank | 2018-06-01         | Nigeria     | Human | IIb   | A       | phylogeny |
| OP535327.1       | GenBank | 2018-03-02         | Nigeria     | Human | IIb   | A       | phylogeny |
| OP535328.1       | GenBank | 2018-03-01         | Nigeria     | Human | IIb   | A       | phylogeny |
| OP535329.1       | GenBank | 2018-03-01         | Nigeria     | Human | IIb   | A       | phylogeny |
| OP535330.1       | GenBank | 2018-02-01         | Nigeria     | Human | IIb   | A       | phylogeny |
| OP535331.1       | GenBank | 2018-01-01         | Nigeria     | Human | IIb   | A       | phylogeny |
| OP535332.1       | GenBank | 2018-01-01         | Nigeria     | Human | IIb   | A       | phylogeny |
| OP535333.1       | GenBank | 2018-01-31         | Nigeria     | Human | IIb   | A       | phylogeny |
| OP535334.1       | GenBank | 2018-02-01         | Nigeria     | Human | IIb   | A       | phylogeny |
| OP535335.1       | GenBank | 2017-10-01         | Nigeria     | Human | IIb   | A.3     | phylogeny |

| Accession number | Source  | Date of collection | Country        | Host  | Clade | Lineage | Analysis  |
|------------------|---------|--------------------|----------------|-------|-------|---------|-----------|
| OP535336.1       | GenBank | 2017-10-01         | Nigeria        | Human | IIb   | A       | phylogeny |
| OP535337.1       | GenBank | 2017-10-31         | Nigeria        | Human | IIb   | A       | phylogeny |
| OP535338.1       | GenBank | 2017-10-31         | Nigeria        | Human | IIb   | A       | phylogeny |
| OP535339.1       | GenBank | 2017-10-01         | Nigeria        | Human | IIb   | A       | phylogeny |
| OP535340.1       | GenBank | 2017-10-31         | Nigeria        | Human | IIb   | A       | phylogeny |
| OP535341.1       | GenBank | 2017-10-01         | Nigeria        | Human | IIb   | A       | phylogeny |
| OP959058.1       | GenBank | 2022-10-27         | Colombia       | Human | IIb   | B.1.2   | phylogeny |
| OP936000.1       | GenBank | 2022-09-26         | Vietnam        | Human | IIb   | A.2.1   | phylogeny |
| OP936001.1       | GenBank | 2022-10-19         | Vietnam        | Human | IIb   | A.2.1   | phylogeny |
| OP838893.1       | GenBank | 2022-06-21         | Italy          | Human | IIb   | B.1.19  | phylogeny |
| OP605560.1       | GenBank | 2022-07-31         | Slovenia       | Human | IIb   | B.1     | phylogeny |
| OP605572.1       | GenBank | 2022-07-01         | Slovenia       | Human | IIb   | A.2.1   | phylogeny |
| OP612674.1       | GenBank | 2019-01-12         | Nigeria        | Human | IIb   | A.1     | phylogeny |
| OP612675.1       | GenBank | 2019-01-30         | Nigeria        | Human | IIb   | A       | phylogeny |
| OP612677.1       | GenBank | 2019-03-12         | Nigeria        | Human | IIb   | A.3     | phylogeny |
| OP612678.1       | GenBank | 2019-03-14         | Nigeria        | Human | IIb   | A       | phylogeny |
| OP612679.1       | GenBank | 2019-03-14         | Nigeria        | Human | IIb   | A.1     | phylogeny |
| OP612680.1       | GenBank | 2019-04-01         | Nigeria        | Human | IIb   | A       | phylogeny |
| OP612681.1       | GenBank | 2019-04-20         | Nigeria        | Human | IIb   | A.1     | phylogeny |
| OP612682.1       | GenBank | 2019-04-20         | Nigeria        | Human | IIb   | A.1     | phylogeny |
| OP612683.1       | GenBank | 2019-04-18         | Nigeria        | Human | IIb   | A.1     | phylogeny |
| OP612684.1       | GenBank | 2019-05-01         | Nigeria        | Human | IIb   | A       | phylogeny |
| OP612685.1       | GenBank | 2019-05-29         | Nigeria        | Human | IIb   | A.1     | phylogeny |
| OP612686.1       | GenBank | 2019-06-26         | Nigeria        | Human | IIb   | A.1     | phylogeny |
| OP612687.1       | GenBank | 2019-07-11         | Nigeria        | Human | IIb   | A.1     | phylogeny |
| OP612688.1       | GenBank | 2019-11-02         | Nigeria        | Human | IIb   | A.1     | phylogeny |
| OP612689.1       | GenBank | 2019-12-17         | Nigeria        | Human | IIb   | A.2     | phylogeny |
| OP612690.1       | GenBank | 2019-12-17         | Nigeria        | Human | IIb   | A.2     | phylogeny |
| OP612691.1       | GenBank | 2020-01-31         | Nigeria        | Human | IIb   | A.2     | phylogeny |
| OP597769.1       | GenBank | 2022-09-26         | Egypt          | Human | IIb   | A.2.1   | phylogeny |
| OX344884.1       | GenBank | 2022-05-24         | Spain          | Human | IIb   | B.1     | phylogeny |
| OX344887.1       | GenBank | 2022-04-27         | Spain          | Human | IIb   | B.1     | phylogeny |
| OP555485.1       | GenBank | 2022-07-12         | Portugal       | Human | IIb   | B.1.9   | phylogeny |
| OP555515.1       | GenBank | 2022-08-01         | Portugal       | Human | IIb   | A.2.3   | phylogeny |
| OP555657.1       | GenBank | 2022-08-24         | Portugal       | Human | IIb   | B.1     | phylogeny |
| OP536812.1       | GenBank | 2022-09-01         | United Kingdom | Human | IIb   | A.3     | phylogeny |
| OP450997.1       | GenBank | 2022-07-01         | USA            | Human | IIb   | A.2.2   | phylogeny |
| OX336038.1       | GenBank | 2022-08-31         | Slovakia       | Human | IIb   | B.1     | phylogeny |
| OP422340.1       | GenBank | 2022-07-13         | Austria        | Human | IIb   | B.1     | phylogeny |
| OP413718.1       | GenBank | 2022-08-31         | United Kingdom | Human | IIb   | A.3     | phylogeny |
| OP415232.1       | GenBank | 2022-08-01         | United Kingdom | Human | IIb   | B.1.2   | phylogeny |
| OP415283.1       | GenBank | 2022-08-04         | United Kingdom | Human | IIb   | B.1     | phylogeny |
| OP382485.1       | GenBank | 2022-07-05         | France         | Human | IIb   | B.1.12  | phylogeny |
| OP382492.1       | GenBank | 2022-07-22         | France         | Human | IIb   | B.1.14  | phylogeny |
| OP331335.1       | GenBank | 2022-06-03         | United Kingdom | Human | IIb   | A.2.1   | phylogeny |
| OP331336.1       | GenBank | 2022-06-29         | United Kingdom | Human | IIb   | A.2.2   | phylogeny |
| OP320548.1       | GenBank | 2022-07-01         | Peru           | Human | IIb   | B.1.6   | phylogeny |
| OP320554.1       | GenBank | 2022-07-09         | Peru           | Human | IIb   | B.1.6   | phylogeny |
| OX291694.1       | GenBank | 2022-08-01         | Slovakia       | Human | IIb   | B.1     | phylogeny |
| OP204857.1       | GenBank | 2022-08-01         | South Korea    | Human | IIb   | B.1.1   | phylogeny |
| OP160532.1       | GenBank | 2022-06-01         | Netherlands    | Human | IIb   | B.1     | phylogeny |
| OP144215.2       | GenBank | 2022-05-30         | Belgium        | Human | IIb   | B.1     | phylogeny |
| OP133007.1       | GenBank | 2022-07-22         | Austria        | Human | IIb   | B.1     | phylogeny |
| ON918611.1       | GenBank | 2022-06-20         | South Africa   | Human | IIb   | B.1.7   | phylogeny |
| ON927248.1       | GenBank | 2022-06-24         | South Africa   | Human | IIb   | B.1.7   | phylogeny |
| ON983168.1       | GenBank | 2022-04-28         | Czech Republic | Human | IIb   | B.1.3   | phylogeny |
| ON959143.1       | GenBank | 2022-06-16         | Finland        | Human | IIb   | B.1.10  | phylogeny |
| OL504741.1       | GenBank | 2019-12-15         | United Kingdom | Human | IIb   | A.1     | phylogeny |
| OL504742.1       | GenBank | 2019-12-15         | United Kingdom | Human | IIb   | A.1     | phylogeny |



| Accession number | Source  | Date of collection | Country        | Host  | Clade | Lineage | Analysis                      |
|------------------|---------|--------------------|----------------|-------|-------|---------|-------------------------------|
| OL504743.1       | GenBank | 2019–12–16         | United Kingdom | Human | IIb   | A.1     | phylogeny                     |
| ON918656.1       | GenBank | 2022–06–30         | Taiwan         | Human | IIb   | B.1.5   | phylogeny                     |
| ON911481.2       | GenBank | 2022–06–28         | Mexico         | Human | IIb   | B.1     | phylogeny                     |
| ON880413.1       | GenBank | 2022–06–14         | Brazil         | Human | IIb   | B.1.12  | phylogeny                     |
| ON880530.1       | GenBank | 2022–05–29         | Canada         | Human | IIb   | B.1     | phylogeny                     |
| ON880531.1       | GenBank | 2022–05–29         | Canada         | Human | IIb   | B.1     | phylogeny                     |
| ON872184.1       | GenBank | 2022–05–30         | Ireland        | Human | IIb   | B.1     | phylogeny                     |
| ON782022.1       | GenBank | 2022–05–31         | Finland        | Human | IIb   | B.1     | phylogeny                     |
| ON745215.1       | GenBank | 2022–05–19         | Italy          | Human | IIb   | B.1     | phylogeny                     |
| ON751962.1       | GenBank | 2022–06–07         | Brazil         | Human | IIb   | B.1     | phylogeny                     |
| ON674051.1       | GenBank | 2022–05–01         | USA            | Human | IIb   | A.2.1   | phylogeny                     |
| ON675438.1       | GenBank | 2022–05–01         | USA            | Human | IIb   | A.2     | phylogeny                     |
| ON676707.1       | GenBank | 2021–07–31         | USA            | Human | IIb   | A.2.3   | phylogeny                     |
| ON676708.1       | GenBank | 2021–11–01         | USA            | Human | IIb   | A.1.1   | phylogeny                     |
| ON649879.1       | GenBank | 2022–05–20         | Israel         | Human | IIb   | B.1     | phylogeny                     |
| OX009124.1       | GenBank | 2022–05–22         | Sweden         | Human | IIb   | B.1.14  | phylogeny                     |
| ON622720.2       | GenBank | 2022–05–24         | Switzerland    | Human | IIb   | B.1     | phylogeny                     |
| ON615424.1       | GenBank | 2022–05–31         | Netherlands    | Human | IIb   | B.1     | phylogeny                     |
| MT903337.1       | GenBank | 2018–01–01         | Nigeria        | Human | IIb   | A       | phylogeny                     |
| MT903338.1       | GenBank | 2018–01–01         | Nigeria        | Human | IIb   | A       | phylogeny                     |
| MT903339.1       | GenBank | 2018–01–01         | Nigeria        | Human | IIb   | A       | phylogeny                     |
| MT903341.1       | GenBank | 2018–08–14         | Nigeria        | Human | IIb   | A.1     | phylogeny                     |
| MT903342.1       | GenBank | 2019–05–30         | Singapore      | Human | IIb   | A.1     | phylogeny                     |
| MT903343.1       | GenBank | 2018–09–30         | United Kingdom | Human | IIb   | A.1     | phylogeny                     |
| MT903344.1       | GenBank | 2018–09–22         | United Kingdom | Human | IIb   | A.1     | phylogeny                     |
| MT903345.1       | GenBank | 2018–09–22         | United Kingdom | Human | IIb   | A.1     | phylogeny                     |
| MT250197.1       | GenBank | 2019–06–07         | Singapore      | Human | IIb   | A.1     | phylogeny                     |
| MN648051.1       | GenBank | 2018–10–04         | Israel         | Human | IIb   | A.1     | phylogeny                     |
| MK783027.1       | GenBank | 2017–11–09         | Nigeria        | Human | IIb   | A       | phylogeny                     |
| MK783028.1       | GenBank | 2017–11–09         | Nigeria        | Human | IIb   | A       | phylogeny                     |
| MK783029.1       | GenBank | 2017–12–06         | Nigeria        | Human | IIb   | A       | phylogeny                     |
| MK783030.1       | GenBank | 2017–11–30         | Nigeria        | Human | IIb   | A       | phylogeny                     |
| MK783031.1       | GenBank | 2017–11–09         | Nigeria        | Human | IIb   | A       | phylogeny                     |
| MK783032.1       | GenBank | 2017–11–01         | Nigeria        | Human | IIb   | A       | phylogeny                     |
| MK783033.1       | GenBank | 2017–10–09         | Nigeria        | Human | IIb   | A.3     | phylogeny                     |
| MG693723.1       | GenBank | 2017–12–31         | Nigeria        | Human | IIb   | A.3     | phylogeny                     |
| MG693724.1       | GenBank | 2017–12–31         | Nigeria        | Human | IIb   | A       | phylogeny                     |
| EPI_ISL_19108154 | GISAID  | 2023–10–02         | Vietnam        | Human | IIb   | C.1     | phylogeny&intra-host mutation |
| EPI_ISL_19108159 | GISAID  | 2023–10–02         | Vietnam        | Human | IIb   | C.1     | phylogeny                     |
| EPI_ISL_19108160 | GISAID  | 2023–10–02         | Vietnam        | Human | IIb   | C.1     | phylogeny                     |
| EPI_ISL_19108161 | GISAID  | 2023–10–04         | Vietnam        | Human | IIb   | C.1     | phylogeny                     |
| EPI_ISL_19108162 | GISAID  | 2023–10–05         | Vietnam        | Human | IIb   | C.1     | phylogeny                     |
| EPI_ISL_19108163 | GISAID  | 2023–10–09         | Vietnam        | Human | IIb   | C.1     | phylogeny                     |
| EPI_ISL_19108164 | GISAID  | 2023–10–10         | Vietnam        | Human | IIb   | C.1     | phylogeny                     |
| EPI_ISL_19108165 | GISAID  | 2023–10–11         | Vietnam        | Human | IIb   | C.1     | phylogeny                     |
| EPI_ISL_19108166 | GISAID  | 2023–10–11         | Vietnam        | Human | IIb   | C.1     | phylogeny                     |
| EPI_ISL_19108167 | GISAID  | 2023–10–12         | Vietnam        | Human | IIb   | C.1     | phylogeny                     |
| EPI_ISL_19108168 | GISAID  | 2023–10–13         | Vietnam        | Human | IIb   | C.1     | phylogeny                     |
| EPI_ISL_19108169 | GISAID  | 2023–10–14         | Vietnam        | Human | IIb   | C.1     | phylogeny                     |
| EPI_ISL_19108170 | GISAID  | 2023–10–16         | Vietnam        | Human | IIb   | C.1     | phylogeny                     |
| EPI_ISL_18993959 | GISAID  | 2024–01–15         | Portugal       | Human | IIb   | C.1     | phylogeny                     |
| EPI_ISL_18993966 | GISAID  | 2024–01–13         | Portugal       | Human | IIb   | C.1     | phylogeny                     |
| EPI_ISL_18993967 | GISAID  | 2023–12–21         | Portugal       | Human | IIb   | C.1     | phylogeny                     |
| EPI_ISL_18993961 | GISAID  | 2023–12–27         | Portugal       | Human | IIb   | C.1     | phylogeny                     |
| EPI_ISL_18993964 | GISAID  | 2023–11–30         | Portugal       | Human | IIb   | C.1     | phylogeny                     |
| EPI_ISL_18702237 | GISAID  | 2023–10–13         | Portugal       | Human | IIb   | C.1     | phylogeny                     |
| EPI_ISL_18702236 | GISAID  | 2023–09–22         | Portugal       | Human | IIb   | C.1     | phylogeny                     |
| EPI_ISL_18076384 | GISAID  | 2023–07–10         | Portugal       | Human | IIb   | C.1     | phylogeny                     |
| EPI_ISL_18702243 | GISAID  | 2023–10–27         | Portugal       | Human | IIb   | C.1     | phylogeny                     |
| EPI_ISL_18228634 | GISAID  | 2023–08–02         | Portugal       | Human | IIb   | C.1     | phylogeny                     |
| EPI_ISL_18553811 | GISAID  | 2023–09–19         | Portugal       | Human | IIb   | C.1     | phylogeny                     |
| EPI_ISL_18553850 | GISAID  | 2023–08–21         | Portugal       | Human | IIb   | C.1     | phylogeny                     |
| EPI_ISL_18228630 | GISAID  | 2023–08–01         | Portugal       | Human | IIb   | C.1     | phylogeny                     |

| Accession number | Source | Date of collection | Country                    | Host  | Clade | Lineage | Analysis  |
|------------------|--------|--------------------|----------------------------|-------|-------|---------|-----------|
| EPI_ISL_18659829 | GISAID | 2023-10-15         | Netherlands                | Human | IIb   | C.1     | phylogeny |
| EPI_ISL_18971017 | GISAID | 2023-11-08         | Brazil                     | Human | IIb   | C.1     | phylogeny |
| EPI_ISL_18659828 | GISAID | 2023-08-29         | Netherlands                | Human | IIb   | C.1     | phylogeny |
| EPI_ISL_18746884 | GISAID | 2023-12-18         | Netherlands                | Human | IIb   | C.1     | phylogeny |
| EPI_ISL_18553829 | GISAID | 2023-08-07         | Portugal                   | Human | IIb   | C.1     | phylogeny |
| EPI_ISL_18228645 | GISAID | 2023-07-21         | Portugal                   | Human | IIb   | C.1     | phylogeny |
| EPI_ISL_18689511 | GISAID | 2023-11-22         | Germany                    | Human | IIb   | C.1     | phylogeny |
| EPI_ISL_18228631 | GISAID | 2023-07-21         | Portugal                   | Human | IIb   | C.1     | phylogeny |
| EPI_ISL_18213375 | GISAID | 2023-06-19         | People's Republic of China | Human | IIb   | C.1     | phylogeny |
| EPI_ISL_18213374 | GISAID | 2023-06-24         | People's Republic of China | Human | IIb   | C.1     | phylogeny |
| EPI_ISL_18702235 | GISAID | 2023-10-02         | Portugal                   | Human | IIb   | C.1     | phylogeny |
| EPI_ISL_19001887 | GISAID | 2024-01-25         | Japan                      | Human | IIb   | C.1     | phylogeny |
| EPI_ISL_17809521 | GISAID | 2023-06-15         | People's Republic of China | Human | IIb   | C.1     | phylogeny |
| EPI_ISL_18075506 | GISAID | 2023-05-01         | Japan                      | Human | IIb   | C.1     | phylogeny |
| EPI_ISL_17665624 | GISAID | 2023-04-17         | Japan                      | Human | IIb   | C.1     | phylogeny |
| EPI_ISL_18097375 | GISAID | 2023-05-02         | Japan                      | Human | IIb   | C.1     | phylogeny |
| EPI_ISL_17817240 | GISAID | 2023-05-19         | Japan                      | Human | IIb   | C.1     | phylogeny |
| EPI_ISL_17592667 | GISAID | 2023-04-06         | Japan                      | Human | IIb   | C.1     | phylogeny |
| EPI_ISL_18075508 | GISAID | 2023-07-07         | Japan                      | Human | IIb   | C.1     | phylogeny |
| EPI_ISL_18739595 | GISAID | 2023-12-01         | Japan                      | Human | IIb   | C.1     | phylogeny |
| EPI_ISL_18414668 | GISAID | 2023-09            | USA                        | Human | IIb   | C.1     | phylogeny |
| EPI_ISL_18125040 | GISAID | 2023-06            | USA                        | Human | IIb   | C.1     | phylogeny |
| EPI_ISL_19002300 | GISAID | 2024-03-07         | Netherlands                | Human | IIb   | C.1     | phylogeny |
| EPI_ISL_18147347 | GISAID | 2023-04-22         | South Korea                | Human | IIb   | C.1     | phylogeny |
| EPI_ISL_18744050 | GISAID | 2023-05-03         | South Korea                | Human | IIb   | C.1     | phylogeny |
| EPI_ISL_17592666 | GISAID | 2023-04-04         | Japan                      | Human | IIb   | C.1     | phylogeny |
| EPI_ISL_17445518 | GISAID | 2023-03-31         | Japan                      | Human | IIb   | C.1     | phylogeny |
| EPI_ISL_18147350 | GISAID | 2023-04-25         | South Korea                | Human | IIb   | C.1     | phylogeny |
| EPI_ISL_16905444 | GISAID | 2022-10            | Japan                      | Human | IIb   | C.1     | phylogeny |
| EPI_ISL_17152843 | GISAID | 2023-02            | Taiwan                     | Human | IIb   | C.1     | phylogeny |
| EPI_ISL_17428286 | GISAID | 2023-03            | Taiwan                     | Human | IIb   | C.1     | phylogeny |
| EPI_ISL_17152764 | GISAID | 2023-03            | Taiwan                     | Human | IIb   | C.1     | phylogeny |
| EPI_ISL_18147336 | GISAID | 2023-04-22         | South Korea                | Human | IIb   | C.1     | phylogeny |
| EPI_ISL_18147340 | GISAID | 2023-04-14         | South Korea                | Human | IIb   | C.1     | phylogeny |
| EPI_ISL_18147343 | GISAID | 2023-04-21         | South Korea                | Human | IIb   | C.1     | phylogeny |
| EPI_ISL_18147353 | GISAID | 2023-04-21         | South Korea                | Human | IIb   | C.1     | phylogeny |
| EPI_ISL_18147361 | GISAID | 2023-04-17         | South Korea                | Human | IIb   | C.1     | phylogeny |
| EPI_ISL_18147358 | GISAID | 2023-04-18         | South Korea                | Human | IIb   | C.1     | phylogeny |
| EPI_ISL_18147334 | GISAID | 2023-04-13         | South Korea                | Human | IIb   | C.1     | phylogeny |
| EPI_ISL_18147360 | GISAID | 2023-04-11         | South Korea                | Human | IIb   | C.1     | phylogeny |
| EPI_ISL_18147344 | GISAID | 2023-04-19         | South Korea                | Human | IIb   | C.1     | phylogeny |
| EPI_ISL_18147363 | GISAID | 2023-04-18         | South Korea                | Human | IIb   | C.1     | phylogeny |
| EPI_ISL_18436040 | GISAID | 2023-10-12         | Indonesia                  | Human | IIb   | C.1     | phylogeny |
| EPI_ISL_18467807 | GISAID | 2023-10-30         | Indonesia                  | Human | IIb   | C.1     | phylogeny |
| EPI_ISL_18467808 | GISAID | 2023-10-25         | Indonesia                  | Human | IIb   | C.1     | phylogeny |
| EPI_ISL_18467797 | GISAID | 2023-10-27         | Indonesia                  | Human | IIb   | C.1     | phylogeny |
| EPI_ISL_18467796 | GISAID | 2023-10-23         | Indonesia                  | Human | IIb   | C.1     | phylogeny |
| EPI_ISL_18467794 | GISAID | 2023-10-27         | Indonesia                  | Human | IIb   | C.1     | phylogeny |
| EPI_ISL_18463161 | GISAID | 2023-10-21         | Indonesia                  | Human | IIb   | C.1     | phylogeny |
| EPI_ISL_18467799 | GISAID | 2023-10-23         | Indonesia                  | Human | IIb   | C.1     | phylogeny |
| EPI_ISL_18467798 | GISAID | 2023-10-27         | Indonesia                  | Human | IIb   | C.1     | phylogeny |
| EPI_ISL_18467801 | GISAID | 2023-10-25         | Indonesia                  | Human | IIb   | C.1     | phylogeny |
| EPI_ISL_18436041 | GISAID | 2023-10-20         | Indonesia                  | Human | IIb   | C.1     | phylogeny |
| EPI_ISL_17246659 | GISAID | 2023-02-13         | Japan                      | Human | IIb   | C.1     | phylogeny |
| EPI_ISL_17428283 | GISAID | 2023-03            | Taiwan                     | Human | IIb   | C.1     | phylogeny |
| EPI_ISL_17445519 | GISAID | 2023-03-31         | Japan                      | Human | IIb   | C.1     | phylogeny |
| EPI_ISL_17692268 | GISAID | 2023-04-28         | Japan                      | Human | IIb   | C.1     | phylogeny |
| EPI_ISL_17837267 | GISAID | 2023-06-12         | Japan                      | Human | IIb   | C.1     | phylogeny |
| EPI_ISL_17959214 | GISAID | 2023-05-11         | Japan                      | Human | IIb   | C.1     | phylogeny |
| EPI_ISL_17518107 | GISAID | 2023-03-17         | Japan                      | Human | IIb   | C.1     | phylogeny |
| EPI_ISL_17762485 | GISAID | 2023-05-17         | Japan                      | Human | IIb   | C.1     | phylogeny |
| EPI_ISL_17959215 | GISAID | 2023-05-11         | Japan                      | Human | IIb   | C.1     | phylogeny |

| Accession number | Source | Date of collection | Country                    | Host  | Clade | Lineage | Analysis  |
|------------------|--------|--------------------|----------------------------|-------|-------|---------|-----------|
| EPI_ISL_17959216 | GISAID | 2023-05-12         | Japan                      | Human | IIb   | C.1     | phylogeny |
| EPI_ISL_17665625 | GISAID | 2023-04-18         | Japan                      | Human | IIb   | C.1     | phylogeny |
| EPI_ISL_17592665 | GISAID | 2023-04-03         | Japan                      | Human | IIb   | C.1     | phylogeny |
| EPI_ISL_17008295 | GISAID | 2023-01-30         | Japan                      | Human | IIb   | C.1     | phylogeny |
| EPI_ISL_18147345 | GISAID | 2023-04-10         | South Korea                | Human | IIb   | C.1     | phylogeny |
| EPI_ISL_18147348 | GISAID | 2023-04-18         | South Korea                | Human | IIb   | C.1     | phylogeny |
| EPI_ISL_18147349 | GISAID | 2023-04-22         | South Korea                | Human | IIb   | C.1     | phylogeny |
| EPI_ISL_17008296 | GISAID | 2023-02-09         | Japan                      | Human | IIb   | C.1     | phylogeny |
| EPI_ISL_18147342 | GISAID | 2023-04-15         | South Korea                | Human | IIb   | C.1     | phylogeny |
| EPI_ISL_17837266 | GISAID | 2023-06-02         | Japan                      | Human | IIb   | C.1     | phylogeny |
| EPI_ISL_17445516 | GISAID | 2023-03-28         | Japan                      | Human | IIb   | C.1     | phylogeny |
| EPI_ISL_18352304 | GISAID | 2023-09-14         | Japan                      | Human | IIb   | C.1     | phylogeny |
| EPI_ISL_18147346 | GISAID | 2023-04-25         | South Korea                | Human | IIb   | C.1     | phylogeny |
| EPI_ISL_17008293 | GISAID | 2023-01-25         | Japan                      | Human | IIb   | C.1     | phylogeny |
| EPI_ISL_17592670 | GISAID | 2023-04-11         | Japan                      | Human | IIb   | C.1     | phylogeny |
| EPI_ISL_17665626 | GISAID | 2023-04-19         | Japan                      | Human | IIb   | C.1     | phylogeny |
| EPI_ISL_17246657 | GISAID | 2023-01-23         | Japan                      | Human | IIb   | C.1     | phylogeny |
| EPI_ISL_18147351 | GISAID | 2023-04-21         | South Korea                | Human | IIb   | C.1     | phylogeny |
| EPI_ISL_18697752 | GISAID | 2023-12-11         | Cambodia                   | Human | IIb   | C.1     | phylogeny |
| EPI_ISL_18147359 | GISAID | 2023-04-12         | South Korea                | Human | IIb   | C.1     | phylogeny |
| EPI_ISL_18055899 | GISAID | 2023-06-26         | Japan                      | Human | IIb   | C.1     | phylogeny |
| EPI_ISL_18147355 | GISAID | 2023-03-13         | South Korea                | Human | IIb   | C.1     | phylogeny |
| EPI_ISL_18557816 | GISAID | 2023-09-22         | Japan                      | Human | IIb   | C.1     | phylogeny |
| EPI_ISL_18557818 | GISAID | 2023-10-25         | Japan                      | Human | IIb   | C.1     | phylogeny |
| EPI_ISL_18075507 | GISAID | 2023-05-01         | Japan                      | Human | IIb   | C.1     | phylogeny |
| EPI_ISL_17817241 | GISAID | 2023-05-20         | Japan                      | Human | IIb   | C.1     | phylogeny |
| EPI_ISL_17817239 | GISAID | 2023-05-15         | Japan                      | Human | IIb   | C.1     | phylogeny |
| EPI_ISL_17837268 | GISAID | 2023-06-09         | Japan                      | Human | IIb   | C.1     | phylogeny |
| EPI_ISL_17665627 | GISAID | 2023-04-21         | Japan                      | Human | IIb   | C.1     | phylogeny |
| EPI_ISL_18055900 | GISAID | 2023-06-26         | Japan                      | Human | IIb   | C.1     | phylogeny |
| EPI_ISL_17692269 | GISAID | 2023-04-28         | Japan                      | Human | IIb   | C.1     | phylogeny |
| EPI_ISL_18352303 | GISAID | 2023-09-11         | Japan                      | Human | IIb   | C.1     | phylogeny |
| EPI_ISL_18352306 | GISAID | 2023-09-19         | Japan                      | Human | IIb   | C.1     | phylogeny |
| EPI_ISL_18059184 | GISAID | 2023-07-03         | People's Republic of China | Human | IIb   | C.1     | phylogeny |
| EPI_ISL_18659846 | GISAID | 2023-11-07         | Netherlands                | Human | IIb   | C.1     | phylogeny |
| EPI_ISL_18702225 | GISAID | 2023-10-06         | Portugal                   | Human | IIb   | C.1     | phylogeny |
| EPI_ISL_18702257 | GISAID | 2023-10-31         | Portugal                   | Human | IIb   | C.1     | phylogeny |
| EPI_ISL_18059183 | GISAID | 2023-06-28         | People's Republic of China | Human | IIb   | C.1     | phylogeny |
| EPI_ISL_18059182 | GISAID | 2023-06-27         | People's Republic of China | Human | IIb   | C.1     | phylogeny |
| EPI_ISL_18076380 | GISAID | 2023-07-07         | Portugal                   | Human | IIb   | C.1     | phylogeny |
| EPI_ISL_18553846 | GISAID | 2023-08-21         | Portugal                   | Human | IIb   | C.1     | phylogeny |
| EPI_ISL_18553847 | GISAID | 2023-08-08         | Portugal                   | Human | IIb   | C.1     | phylogeny |
| EPI_ISL_18702208 | GISAID | 2023-10-17         | Portugal                   | Human | IIb   | C.1     | phylogeny |
| EPI_ISL_18702253 | GISAID | 2023-10-19         | Portugal                   | Human | IIb   | C.1     | phylogeny |
| EPI_ISL_18702234 | GISAID | 2023-10-29         | Portugal                   | Human | IIb   | C.1     | phylogeny |
| EPI_ISL_18044983 | GISAID | 2023-06-20         | Portugal                   | Human | IIb   | C.1     | phylogeny |
| EPI_ISL_18702241 | GISAID | 2023-10-03         | Portugal                   | Human | IIb   | C.1     | phylogeny |
| EPI_ISL_18553835 | GISAID | 2023-07-18         | Portugal                   | Human | IIb   | C.1     | phylogeny |
| EPI_ISL_18553816 | GISAID | 2023-07-13         | Portugal                   | Human | IIb   | C.1     | phylogeny |
| EPI_ISL_18076389 | GISAID | 2023-07-07         | Portugal                   | Human | IIb   | C.1     | phylogeny |
| EPI_ISL_18553833 | GISAID | 2023-08-10         | Portugal                   | Human | IIb   | C.1     | phylogeny |
| EPI_ISL_18228633 | GISAID | 2023-07-19         | Portugal                   | Human | IIb   | C.1     | phylogeny |
| EPI_ISL_18634755 | GISAID | 2023-10            | Ireland                    | Human | IIb   | C.1     | phylogeny |
| EPI_ISL_18228640 | GISAID | 2023-07-26         | Portugal                   | Human | IIb   | C.1     | phylogeny |
| EPI_ISL_18746885 | GISAID | 2023-12-19         | Netherlands                | Human | IIb   | C.1     | phylogeny |
| EPI_ISL_18781817 | GISAID | 2023-10-14         | USA                        | Human | IIb   | C.1     | phylogeny |
| EPI_ISL_18634756 | GISAID | 2023-10            | Ireland                    | Human | IIb   | C.1     | phylogeny |
| EPI_ISL_18308397 | GISAID | 2023-08-18         | Ireland                    | Human | IIb   | C.1     | phylogeny |
| EPI_ISL_18308399 | GISAID | 2023-08-28         | Ireland                    | Human | IIb   | C.1     | phylogeny |
| EPI_ISL_18308398 | GISAID | 2023-08-31         | Ireland                    | Human | IIb   | C.1     | phylogeny |
| EPI_ISL_18308396 | GISAID | 2023-08-16         | Ireland                    | Human | IIb   | C.1     | phylogeny |
| EPI_ISL_18553837 | GISAID | 2023-07-15         | Portugal                   | Human | IIb   | C.1     | phylogeny |

| Accession number | Source  | Date of collection | Country     | Host  | Clade | Lineage | Analysis  |
|------------------|---------|--------------------|-------------|-------|-------|---------|-----------|
| EPI_ISL_18228621 | GISAID  | 2023-07-26         | Portugal    | Human | IIb   | C.1     | phylogeny |
| EPI_ISL_18702249 | GISAID  | 2023-10-20         | Portugal    | Human | IIb   | C.1     | phylogeny |
| EPI_ISL_18702212 | GISAID  | 2023-09-24         | Portugal    | Human | IIb   | C.1     | phylogeny |
| EPI_ISL_18702252 | GISAID  | 2023-11-20         | Portugal    | Human | IIb   | C.1     | phylogeny |
| EPI_ISL_18702229 | GISAID  | 2023-10-29         | Portugal    | Human | IIb   | C.1     | phylogeny |
| EPI_ISL_18702224 | GISAID  | 2023-10-12         | Portugal    | Human | IIb   | C.1     | phylogeny |
| EPI_ISL_18702227 | GISAID  | 2023-11-09         | Portugal    | Human | IIb   | C.1     | phylogeny |
| EPI_ISL_18702256 | GISAID  | 2023-10-12         | Portugal    | Human | IIb   | C.1     | phylogeny |
| EPI_ISL_18702223 | GISAID  | 2023-11-02         | Portugal    | Human | IIb   | C.1     | phylogeny |
| EPI_ISL_18553813 | GISAID  | 2023-09-08         | Portugal    | Human | IIb   | C.1     | phylogeny |
| EPI_ISL_18702255 | GISAID  | 2023-09-19         | Portugal    | Human | IIb   | C.1     | phylogeny |
| EPI_ISL_18702250 | GISAID  | 2023-09-22         | Portugal    | Human | IIb   | C.1     | phylogeny |
| EPI_ISL_18702231 | GISAID  | 2023-09-26         | Portugal    | Human | IIb   | C.1     | phylogeny |
| EPI_ISL_18702221 | GISAID  | 2023-11-07         | Portugal    | Human | IIb   | C.1     | phylogeny |
| EPI_ISL_18702230 | GISAID  | 2023-09-29         | Portugal    | Human | IIb   | C.1     | phylogeny |
| EPI_ISL_18702240 | GISAID  | 2023-11-01         | Portugal    | Human | IIb   | C.1     | phylogeny |
| EPI_ISL_18553826 | GISAID  | 2023-09-12         | Portugal    | Human | IIb   | C.1     | phylogeny |
| EPI_ISL_18702226 | GISAID  | 2023-10-18         | Portugal    | Human | IIb   | C.1     | phylogeny |
| EPI_ISL_18702247 | GISAID  | 2023-10-03         | Portugal    | Human | IIb   | C.1     | phylogeny |
| EPI_ISL_18702209 | GISAID  | 2023-11-18         | Portugal    | Human | IIb   | C.1     | phylogeny |
| EPI_ISL_18702251 | GISAID  | 2023-10-26         | Portugal    | Human | IIb   | C.1     | phylogeny |
| OR459803.1       | GenBank | 2023-04-25         | South Korea | Human | IIb   | C.1     | phylogeny |
| OR459792.1       | GenBank | 2023-04-19         | South Korea | Human | IIb   | C.1     | phylogeny |
| OR459799.1       | GenBank | 2023-04-22         | South Korea | Human | IIb   | C.1     | phylogeny |
| OR459784.1       | GenBank | 2023-04-14         | South Korea | Human | IIb   | C.1     | phylogeny |
| OR459794.1       | GenBank | 2023-04-21         | South Korea | Human | IIb   | C.1     | phylogeny |
| OR459790.1       | GenBank | 2023-04-18         | South Korea | Human | IIb   | C.1     | phylogeny |
| OR459796.1       | GenBank | 2023-04-21         | South Korea | Human | IIb   | C.1     | phylogeny |
| OR459782.1       | GenBank | 2023-04-12         | South Korea | Human | IIb   | C.1     | phylogeny |
| OR427348.1       | GenBank | 2023-06            | USA         | Human | IIb   | C.1     | phylogeny |
| OR459779.1       | GenBank | 2023-04-06         | South Korea | Human | IIb   | C.1     | phylogeny |
| OR459804.1       | GenBank | 2023-04-25         | South Korea | Human | IIb   | C.1     | phylogeny |
| OR459785.1       | GenBank | 2023-04-15         | South Korea | Human | IIb   | C.1     | phylogeny |
| OR459780.1       | GenBank | 2023-04-10         | South Korea | Human | IIb   | C.1     | phylogeny |
| OR459791.1       | GenBank | 2023-04-18         | South Korea | Human | IIb   | C.1     | phylogeny |
| OR459797.1       | GenBank | 2023-04-22         | South Korea | Human | IIb   | C.1     | phylogeny |
| OR459798.1       | GenBank | 2023-04-22         | South Korea | Human | IIb   | C.1     | phylogeny |
| OR459788.1       | GenBank | 2023-04-18         | South Korea | Human | IIb   | C.1     | phylogeny |
| OR459781.1       | GenBank | 2023-04-11         | South Korea | Human | IIb   | C.1     | phylogeny |
| OR665166.1       | GenBank | 2023-09            | USA         | Human | IIb   | C.1     | phylogeny |
| OR459778.1       | GenBank | 2023-03-13         | South Korea | Human | IIb   | C.1     | phylogeny |
| OR972728.1       | GenBank | 2023-11-22         | Germany     | Human | IIb   | C.1     | phylogeny |
| OR855754.1       | GenBank | 2023-07-05         | South Korea | Human | IIb   | C.1     | phylogeny |
| OR855745.1       | GenBank | 2023-06-01         | South Korea | Human | IIb   | C.1     | phylogeny |
| OR855755.1       | GenBank | 2023-07-05         | South Korea | Human | IIb   | C.1     | phylogeny |
| OR855753.1       | GenBank | 2023-09-15         | South Korea | Human | IIb   | C.1     | phylogeny |
| OR855752.1       | GenBank | 2023-07-05         | South Korea | Human | IIb   | C.1     | phylogeny |
| OR855765.1       | GenBank | 2023-08-03         | South Korea | Human | IIb   | C.1     | phylogeny |
| OR855758.1       | GenBank | 2023-07-05         | South Korea | Human | IIb   | C.1     | phylogeny |
| OR855757.1       | GenBank | 2023-07-05         | South Korea | Human | IIb   | C.1     | phylogeny |
| OR855756.1       | GenBank | 2023-07-05         | South Korea | Human | IIb   | C.1     | phylogeny |
| OR855761.1       | GenBank | 2023-09-15         | South Korea | Human | IIb   | C.1     | phylogeny |
| OR855759.1       | GenBank | 2023-09-15         | South Korea | Human | IIb   | C.1     | phylogeny |
| OR855751.1       | GenBank | 2023-07-05         | South Korea | Human | IIb   | C.1     | phylogeny |
| OR855746.1       | GenBank | 2023-06-23         | South Korea | Human | IIb   | C.1     | phylogeny |
| OR855748.1       | GenBank | 2023-06-23         | South Korea | Human | IIb   | C.1     | phylogeny |
| OR855766.1       | GenBank | 2023-08-28         | South Korea | Human | IIb   | C.1     | phylogeny |
| OR855767.1       | GenBank | 2023-08-28         | South Korea | Human | IIb   | C.1     | phylogeny |
| OR855749.1       | GenBank | 2023-07-05         | South Korea | Human | IIb   | C.1     | phylogeny |
| OR459795.1       | GenBank | 2023-04-21         | South Korea | Human | IIb   | C.1     | phylogeny |
| OR855750.1       | GenBank | 2023-07-05         | South Korea | Human | IIb   | C.1     | phylogeny |
| OR855744.1       | GenBank | 2023-05-03         | South Korea | Human | IIb   | C.1     | phylogeny |
| OR459787.1       | GenBank | 2023-04-17         | South Korea | Human | IIb   | C.1     | phylogeny |
| OR487991.1       | GenBank | 2023-08-02         | Portugal    | Human | IIb   | C.1     | phylogeny |
| OR487992.1       | GenBank | 2023-08-02         | Portugal    | Human | IIb   | C.1     | phylogeny |
| OR459783.1       | GenBank | 2023-04-13         | South Korea | Human | IIb   | C.1     | phylogeny |
| OR459802.1       | GenBank | 2023-04-25         | South Korea | Human | IIb   | C.1     | phylogeny |
| LC760460.1       | GenBank | 2023-01-23         | Japan       | Human | IIb   | C.1     | phylogeny |

| Accession number | Source  | Date of collection | Country  | Host  | Clade | Lineage | Analysis            |
|------------------|---------|--------------------|----------|-------|-------|---------|---------------------|
| LC756923.1       | GenBank | 2023-01-25         | Japan    | Human | IIb   | C.1     | phylogeny           |
| LC753968.1       | GenBank | 2022-09-30         | Japan    | Human | IIb   | C.1     | phylogeny           |
| LC753969.1       | GenBank | 2022-10-01         | Japan    | Human | IIb   | C.1     | phylogeny           |
| EPI_ISL_19108171 | GISAID  | 2023-09-24         | Vietnam  | Human | IIb   | C.1     | phylogeny           |
| OR326991.1       | GenBank | 2023-06-15         | Portugal | Human | IIb   | C.1     | phylogeny           |
| OR326992.1       | GenBank | 2023-06-16         | Portugal | Human | IIb   | C.1     | phylogeny           |
| OR326993.1       | GenBank | 2023-06-20         | Portugal | Human | IIb   | C.1     | phylogeny           |
| OR326994.1       | GenBank | 2023-06-22         | Portugal | Human | IIb   | C.1     | phylogeny           |
| OR326995.1       | GenBank | 2023-06-22         | Portugal | Human | IIb   | C.1     | phylogeny           |
| OR326996.1       | GenBank | 2023-06-25         | Portugal | Human | IIb   | C.1     | phylogeny           |
| OR326997.1       | GenBank | 2023-06-25         | Portugal | Human | IIb   | C.1     | phylogeny           |
| OR035728.1       | GenBank | 2022-10-28         | Belgium  | Human | IIb   | C.1     | phylogeny           |
| OQ721952.1       | GenBank | 2023-03            | Taiwan   | Human | IIb   | C.1     | phylogeny           |
| LC760461.1       | GenBank | 2023-02-13         | Japan    | Human | IIb   | C.1     | phylogeny           |
| OQ581853.1       | GenBank | 2023-02            | Taiwan   | Human | IIb   | C.1     | phylogeny           |
| OQ581855.1       | GenBank | 2023-03            | Taiwan   | Human | IIb   | C.1     | phylogeny           |
| LC756922.1       | GenBank | 2023-01-25         | Japan    | Human | IIb   | C.1     | phylogeny           |
| LC756924.1       | GenBank | 2023-01-30         | Japan    | Human | IIb   | C.1     | phylogeny           |
| LC756925.1       | GenBank | 2023-02-09         | Japan    | Human | IIb   | C.1     | phylogeny           |
| EPI_ISL_19108155 | GISAID  | 2023-10-09         | Vietnam  | Human | IIb   | C.1     | intra-host mutation |
| EPI_ISL_19108156 | GISAID  | 2023-10-16         | Vietnam  | Human | IIb   | C.1     | intra-host mutation |
| EPI_ISL_19108157 | GISAID  | 2023-10-11         | Vietnam  | Human | IIb   | C.1     | intra-host mutation |
| EPI_ISL_19108158 | GISAID  | 2023-10-19         | Vietnam  | Human | IIb   | C.1     | intra-host mutation |

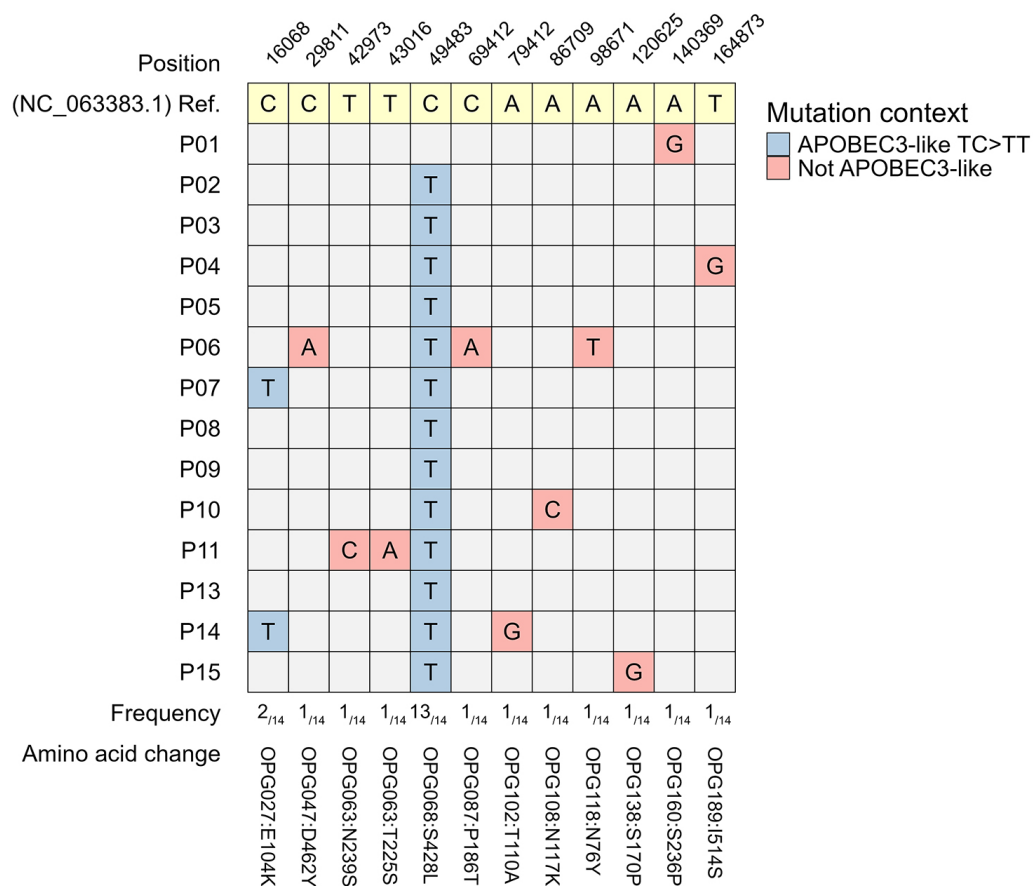

**Appendix Figure 1.** Novel nonsynonymous substitutions documents in 14 sequences of the present study. Notes to Appendix Figure 1: E: Glutamate, K: Lysine, D: Aspartate, Y: Tyrosine, S: Serine, N: Asparagine, T: Threonine, L: Leucine, P: Proline, A: Alanine and I: Isoleucine

## OPG068:S428L

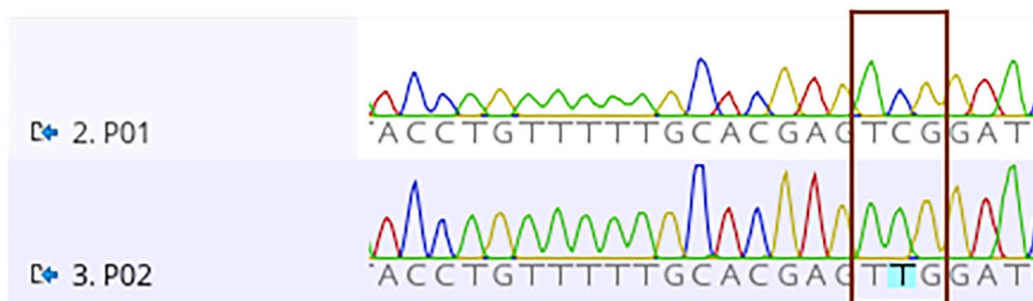

**Appendix Figure 2.** Representative of Sanger sequencing results confirming the presence of the novel APOBEC3-like mutation (OPG068: S428L) in the original samples.

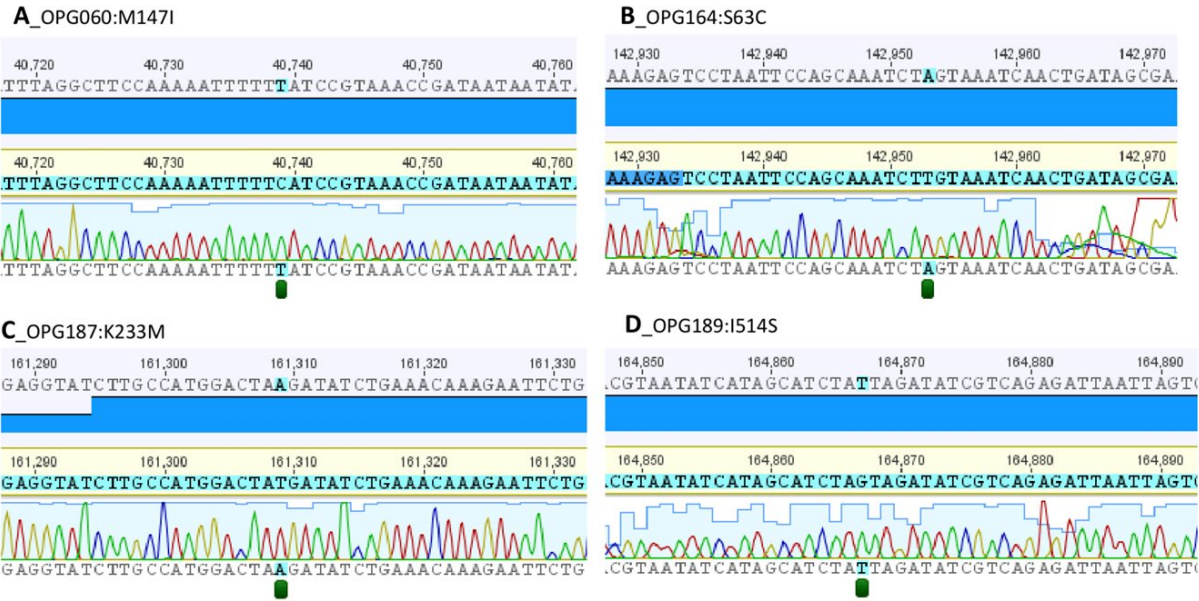

**Appendix Figure 3.** Screen shots showing results of Sanger sequencing reads aligned to corresponding metagenomic reads (cyan) obtained from longitudinal samples. Positions with potential nucleotide substitutions leading to amino acid changes observed in metagenomics datasets are highlighted. The discrepancy between Sanger and Metagenomics reads means substitutions were not confirmed by Sanger sequencing. Otherwise, great agreements between the two methods were achieved, especially despite low sequencing coverage obtained from metagenomics reads carrying the two nonsynonymous substitutions (Ile to Met and Ser to Cys shown in Appendix Table 7).
